# Supplementary material for: Atomic structures of RNA nanotubes and their comparison with DNA nanotubes
Source: Royal Society of Chemistry journal article supplement (doi:10.1039/c9nr00786e), 2019-01-01
Supplement: c9nr00786e1.pdf [file c9nr00786e1.pdf]

## Supporting Information

### Atomic Structures of RNA Nanotubes and comparison with DNA nanotubes

Supriyo Naskar<sup>1</sup>, Himanshu Joshi<sup>1,§</sup>, Banani Chakraborty<sup>2</sup>, Nadrian C. Seeman<sup>3</sup>,

Prabal K Maiti<sup>1,\*</sup>

<sup>1</sup> Center for Condensed Matter Theory, Department of Physics, Indian Institute of Science,  
Bangalore 560012, India

<sup>2</sup> Department of Chemical Engineering, Indian Institute of Science, Bangalore 560012, India

<sup>3</sup> Department of Chemistry, New York University, New York 10012, United States

**\*Corresponding author. E-mail: maiti@iisc.ac.in**

## Section 1: Design of The RNTs

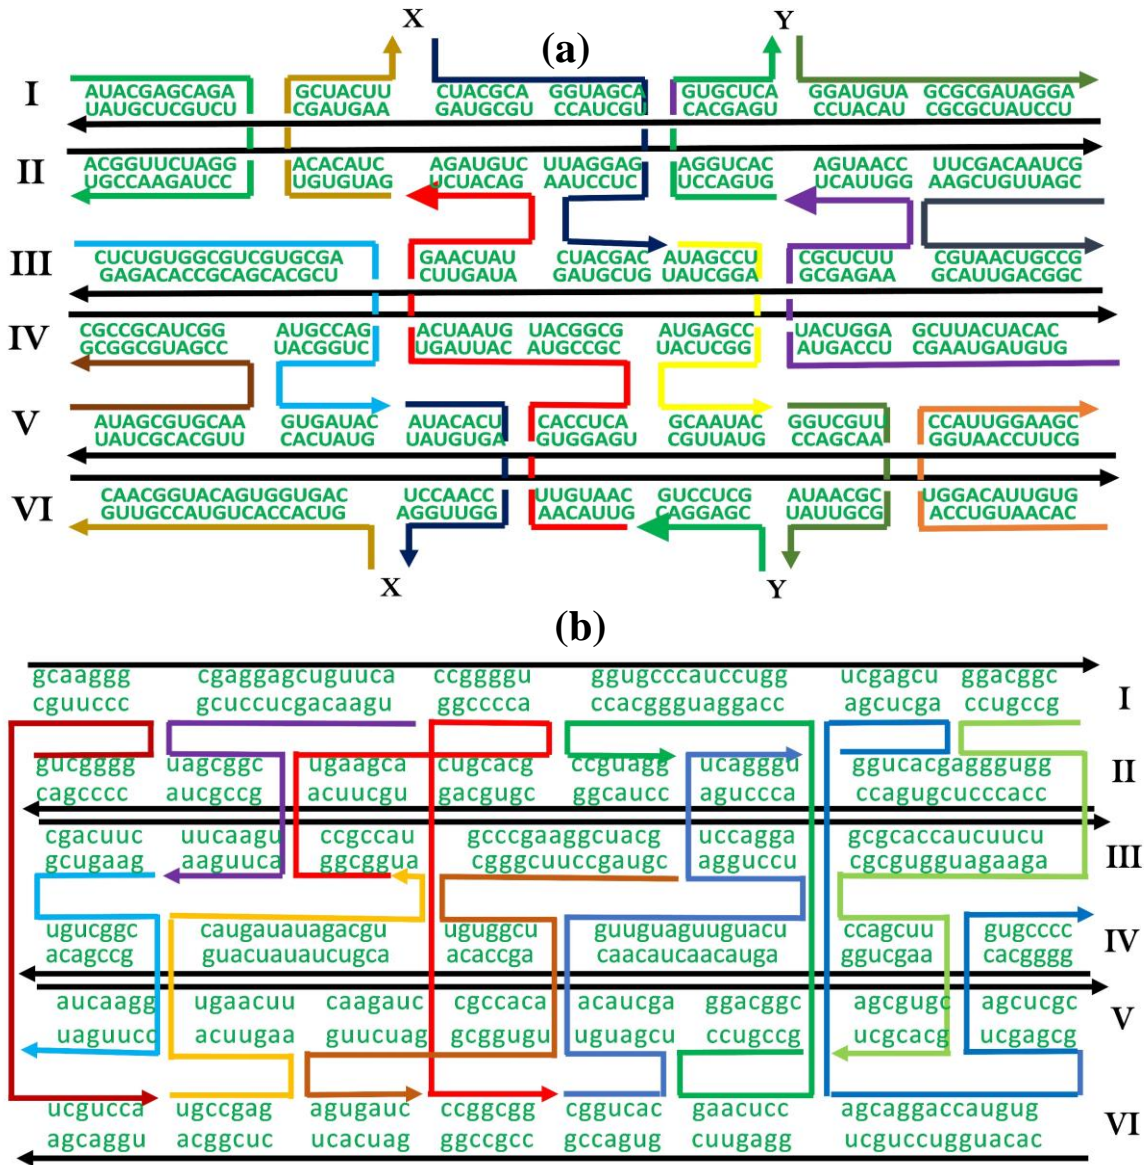

**Figure S1.** The structure of the RNT is built using NAB of AmberTools16. (a) RNT1: The design of crossovers and nicks are same as DNT as previously reported<sup>1</sup>. Only the thymine is replaced by uracil. (b) RNT2: The structure is taken from experimental design by Endo et. al.<sup>2</sup>. The structure is a portion of the original RNA origami Nanotube. RNT1 has 57bp dsRNA per helical domain whereas RNT2 has 56bp dsRNA per helical domain. Different color represents different staple strands.

## Section 2: Cross-sectional Area of Moment of Inertia (AMI) of the RNTs

The second moment of inertia or Cross-sectional area of moment of inertia for an arbitrary shape  $V$  with respect to a given axis  $ZZ'$  is defined as,

$$I_{ZZ'} = \iint_A r^2 dA$$

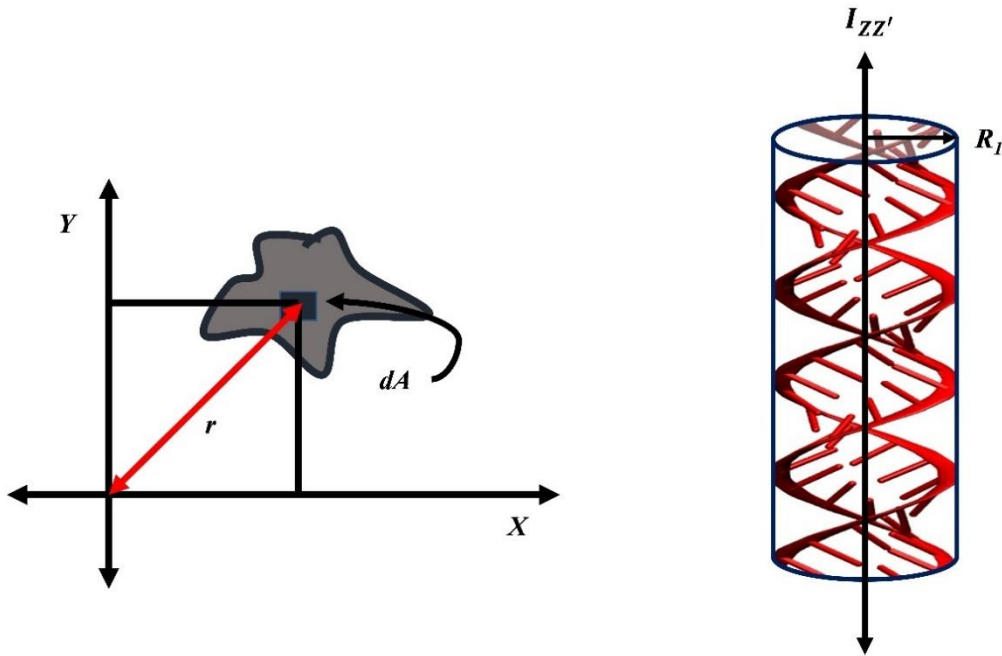

Where,  $r$  is distance of the infinite small area element  $dA$ .

Assuming, dsRNA as a cylindrical tube we can write the AMI of a single dsRNA with respect to the long axis as following,

$$I_{ZZ'} = I_0 = \frac{\pi R_1^4}{4}$$

Now, according to the parallel axis theorem, the AMI for RNT consisting of 6 dsRNA arranged in hexagonal manner with respect to the long axis is<sup>1,3</sup>,

$$I = \frac{1}{2} \left[ \sum_6 I_0 + (4R_1^2 + 2R_2^2)A_1 + I_0 \left( 16 \frac{R_2^2}{R_1^2} - 10 \right) \right]$$

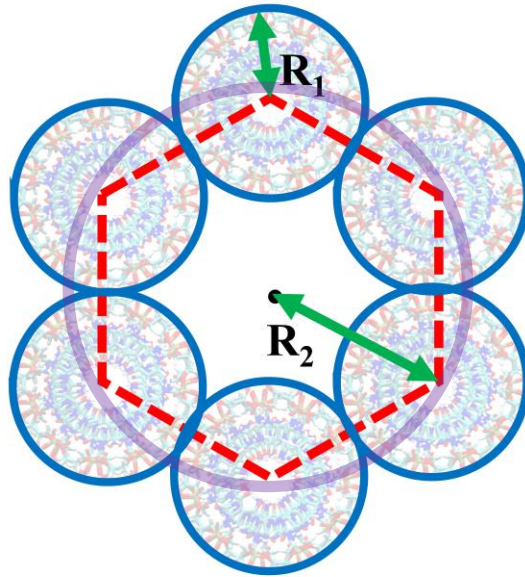

In our all analysis, we took  $R_1 = 1.125 \text{ nm}$ . To calculate  $R_2$ , we average the pore radius of the RNTs.



### Section 3: Definition of Slice and Segments

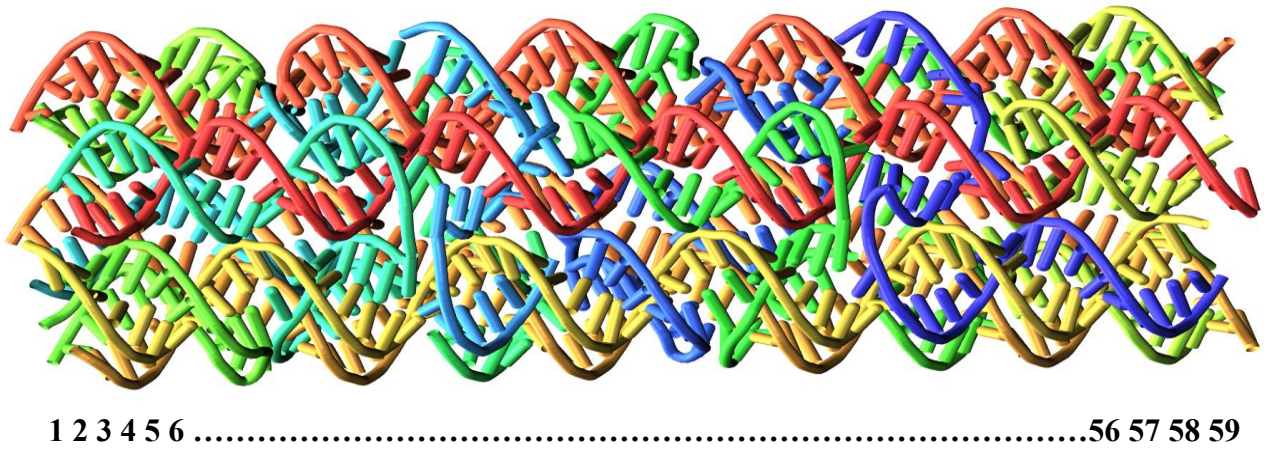

(a) Slice Index

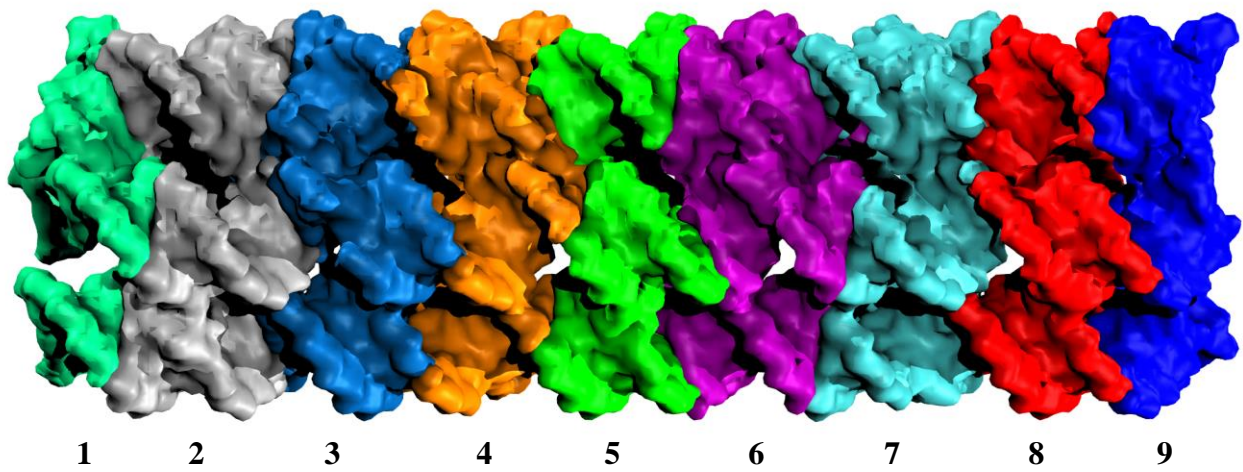

(b) Segments

**Figure S2.** (a) Definition of Slice used for different analysis. Each RNT is composed of six 57-mer (RNT1) or 56-mer (RNT2) ds-RNA. So, the RNT is divided into 57/56 slices containing 1 bp from each helical domain. (b) To define segments, we divide the RNTs into 9 parts. Each part contains 7 bp per helical domain except the terminal ones, which have 4 bp per helical domain. For RNT2 the middle segment has 1 less bp per helical domain. Different color represents different segments.

#### Section 4: Comparison of radius profile of DNT and RNTs

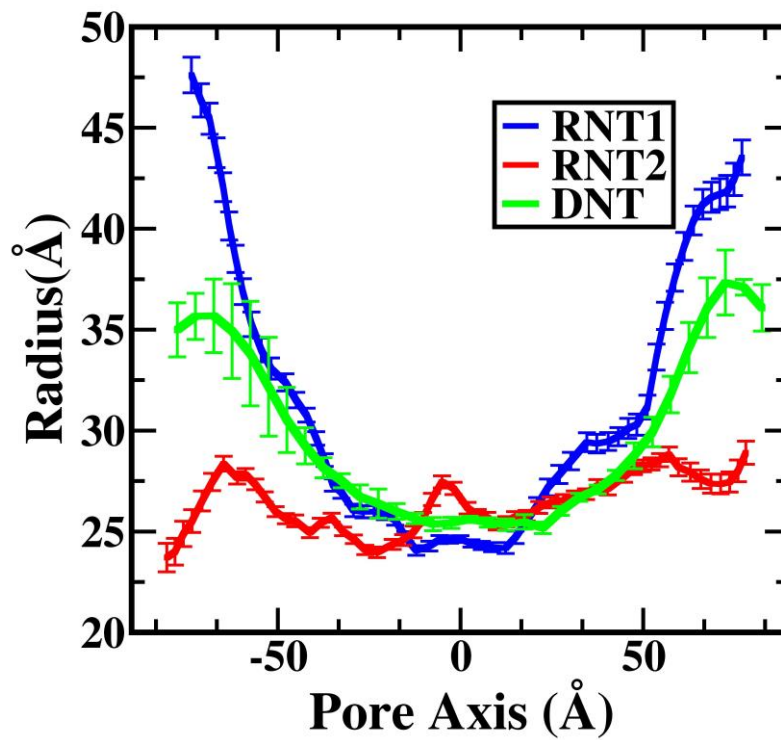

**Figure S4.** Radius of the pore of RNT1, RNT2 and DNT.

## Section 5: RNTs in charge neutral $\text{Mg}^{2+}$ and 10mM of $\text{MgCl}_2$ Solution

### Details of the Systems

| Type of the RNT                          | Box dimension [ $\text{\AA}$ ] | Total No. of Atoms | No. of $\text{Mg}^{2+}$ added to neutralize | No. of $\text{Cl}^-$ |
|------------------------------------------|--------------------------------|--------------------|---------------------------------------------|----------------------|
| RNT1 in charge neutral $\text{Mg}^{2+}$  | [118.9×125.5×234.6]            | 299857             | 333                                         | -                    |
| RNT2 in charge neutral $\text{Mg}^{2+}$  | [118.9×125.5×232.1]            | 296720             | 328                                         | -                    |
| RNT1 in 10mM of $\text{MgCl}_2$ Solution | [118.9×125.5×234.6]            | 299731             | 354                                         | 42                   |
| RNT2 in 10mM of $\text{MgCl}_2$ Solution | [118.9×125.5×232.1]            | 296594             | 349                                         | 42                   |

## RMSD and RMSF

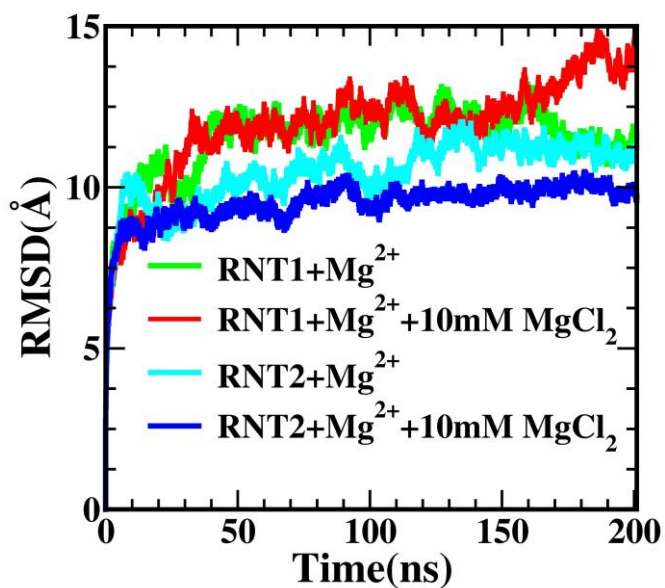

**Figure S4.** RMSD of the different RNTs in charge neutral Mg<sup>2+</sup> solution and 10mM MgCl<sub>2</sub> solution. RMSD is calculated with respect to the energy minimized structure.

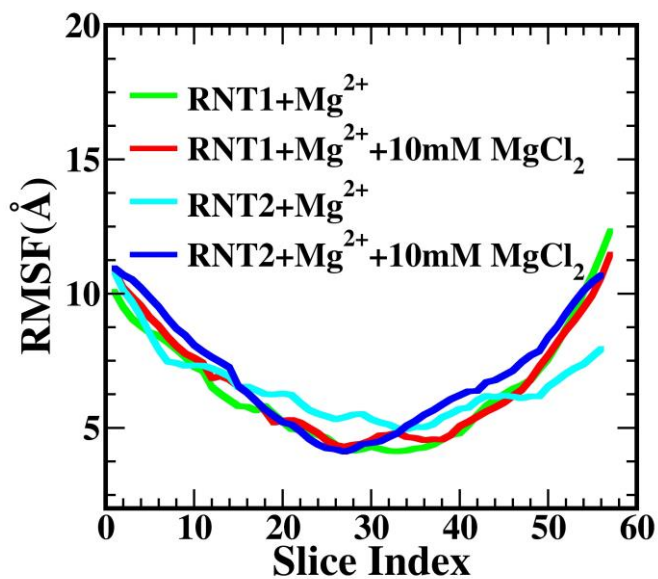

**Figure S5.** RMSF of the RNTs as a function of Slice Index.



### Radius of the Pore

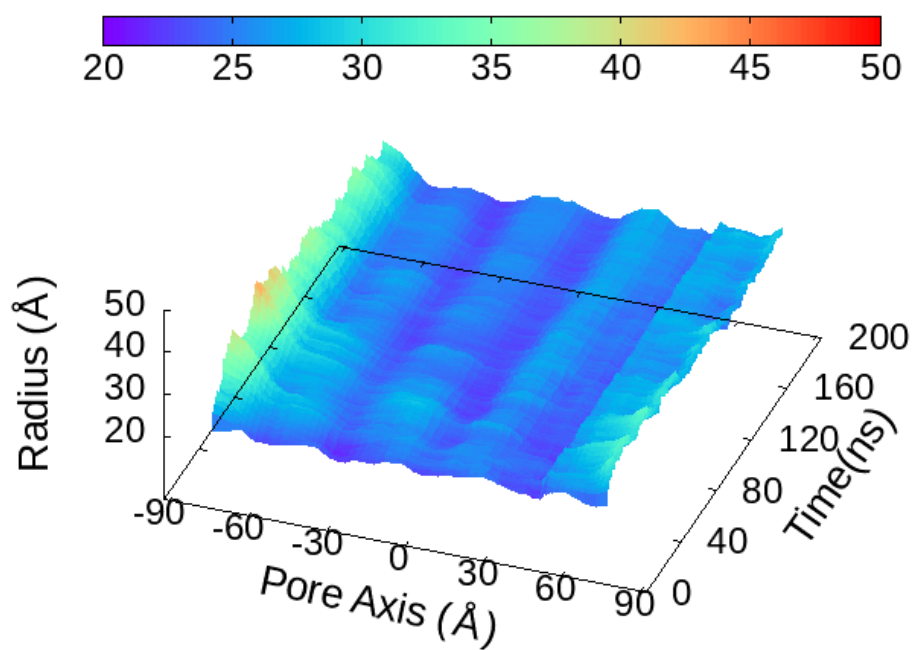

**Figure S6.** Radius of the pore of RNT1 in charge neutral  $Mg^{2+}$  solution.

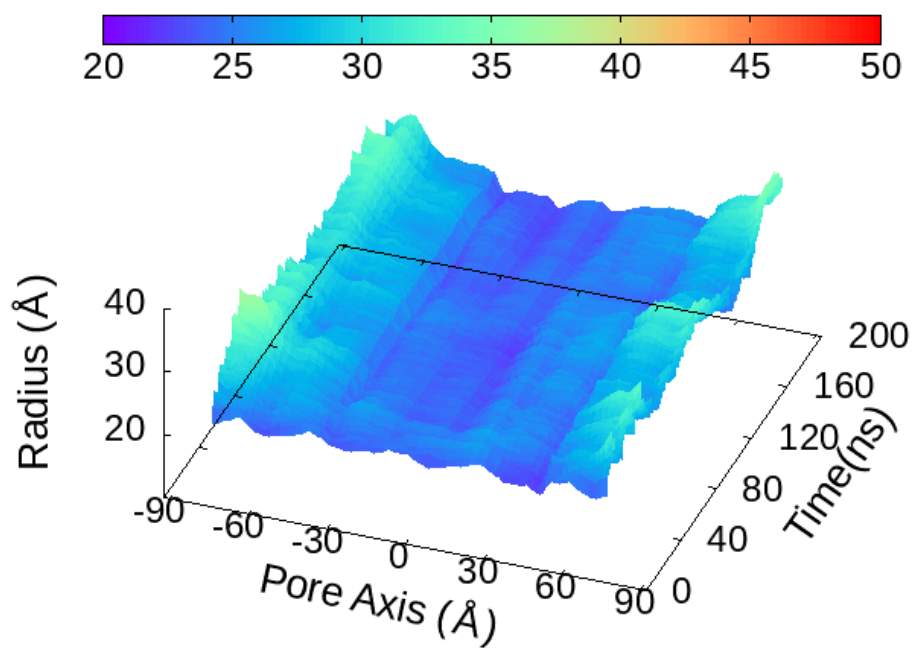

**Figure S7.** Radius of the pore of RNT1 in 10mM  $MgCl_2$  solution.

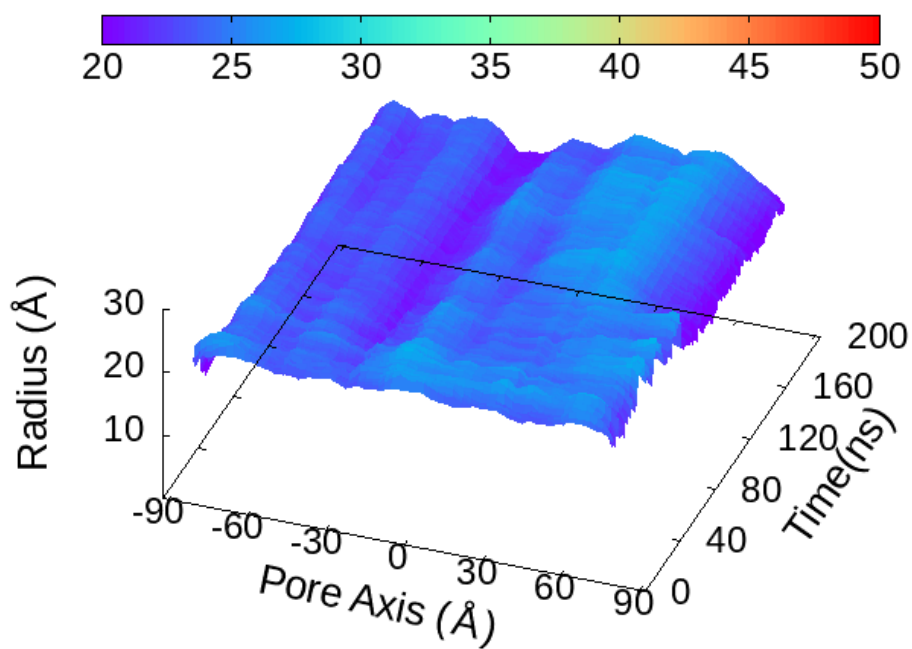

**Figure S8.** Radius of the pore of RNT2 in charge neutral  $Mg^{2+}$  solution.

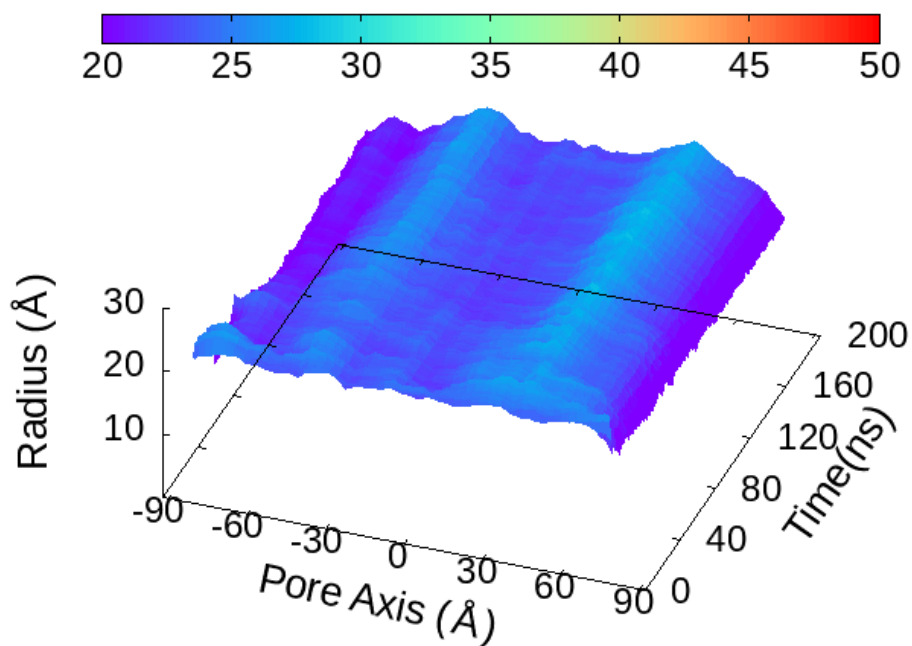

**Figure S9.** Radius of the pore of RNT2 in 10mM  $MgCl_2$  solution.

## Reference

1. T. Wang, D. Schiffels, S. Martinez Cuesta, D. Kuchnir Fyngenson and N. C. Seeman, *Journal of the American Chemical Society*, 2012, **134**, 1606-1616.
2. M. Endo, Y. Takeuchi, T. Emura, K. Hidaka and H. Sugiyama, *Chemistry—A European Journal*, 2014, **20**, 15330-15333.
3. H. Joshi, A. Kaushik, N. C. Seeman and P. K. Maiti, *ACS nano*, 2016, **10**, 7780-7791.
